# Supplementary material for: Material Need Insecurities among People on Hemodialysis: Burden, Sociodemographic Risk Factors, and Associations with Substance Use
Source: PubMed Central journal article supplement — Kidney360. 2023 Nov 9;4(11):1590–7. doi: 10.34067/KID.0000000000000279 (PMC10695650; doi:10.34067/kid.0000000000000279), 2023-11-09
Supplement: kidney360-4-1590-s001.pdf [file kidney360-4-1590-s001.pdf]

**Supplementary Materials**

**Table of Contents**

**Study Survey Tool**..... 2

**Table S1. Unadjusted Odds of Food Insecurity by Demographic Risk Factors and Residential Segregation** ..... 18

**First, please answer some general questions about you.**

**What is your date of birth?**

**How old are you today?**

**What is your current zip code?**

**Which of the following best describes your gender?**

- Female
- Male
- Non-binary/Third gender
- Transgender female
- Transgender male
- Other (please describe):
- Don't know or choose not to answer

**Which of the following best describes your race?**

- White
- Black
- Asian
- American Indian or Alaska Native
- Native Hawaiian or Other Pacific Islander
- Another race (please describe):
- Two or more races
- Don't know or choose not to answer

**Are you of Spanish, Hispanic, or Latino origin?**

- Yes
- No
- Don't know or choose not to answer

**What's the highest grade in school that you completed?**

- No formal schooling
- 1 – 11 years of school (less than 12)
- High school or GED equivalent
- Two-year college/ Associates degree
- Four-year college
- Master's degree
- Law degree
- MD or PhD
- Multiple graduate degrees
- Other (please describe):
- Don't know or choose not to answer

**What is your current marital status?**

- Married
- Living with a partner
- Separated
- Divorced
- Widowed
- Never married
- Don't know or choose not to answer

The following are several statements that people have made about their food situation. For these statements, please tell me whether the statement was often true, sometimes true, or never true for you in the last 12 months—that is, since last \_\_\_\_\_.

|                                                                                           | Often true               | Sometimes true           | Never true               | Don't know or choose not to answer |
|-------------------------------------------------------------------------------------------|--------------------------|--------------------------|--------------------------|------------------------------------|
| “(I/We) worried whether (my/our) food would run out before (I/we) got money to buy more”  | <input type="checkbox"/> | <input type="checkbox"/> | <input type="checkbox"/> | <input type="checkbox"/>           |
| “The food that (I/we) bought just didn't last, and (I/we) didn't have money to get more.” | <input type="checkbox"/> | <input type="checkbox"/> | <input type="checkbox"/> | <input type="checkbox"/>           |
| “(I/we) couldn't afford to eat balanced meals.”                                           | <input type="checkbox"/> | <input type="checkbox"/> | <input type="checkbox"/> | <input type="checkbox"/>           |

↓

If you answered “Never true” to all 3 questions, skip to page **8**.

**In the last 12 months, since last \_\_\_\_\_, did you or other adults in your household ever cut the size of your meals or skip meals because there wasn't enough money for food?**

- Yes
- No
- Don't know or choose not to answer

**If yes, how often did this happen—almost every month, some months but not every month, or in only 1 or 2 months?**

- Almost every month
- Some months but not every month
- Only one or two months
- Don't know or choose not to answer

**In the last 12 months, did you ever eat less than you felt you should because there wasn't enough money for food?**

- Yes
- No
- Don't know or choose not to answer

**In the last 12 months, were you every hungry but didn't eat because there wasn't enough money for food?**

- Yes
- No
- Don't know or choose not to answer

**In the last 12 months, did you lose weight because there wasn't enough money for food?**

- Yes
- No
- Don't know or choose not to answer

**If you answered "No" to all four questions, skip to page 8.**

**In the last 12 months, did you or other adults in your household ever not eat for a whole day because there wasn't enough money for food?**

- Yes
- No
- Don't know or choose not to answer

**If yes, how often did this happen—almost every month, some months but not every month, or in only 1 or 2 months?**

- Almost every month
- Some months but not every month
- Only one or two months
- Don't know or choose not to answer

**These next questions ask about your housing situation. Choose the one best answer for you.**

**Do you have a home of your own that is safe and where you have lived for the past 90 days?**

- Yes
- No

**Are you worried that you may not have a home of your own that is safe and where you can live for the next 90 days?**

- Yes
- No

**These next questions are about your finances. Choose the one best answer for you.**

**Which of these categories best describes your total combined family income for your household in the last 12 months? This should include income (before taxes) from all sources, wages, rent from properties, social security, disability and/or veteran's benefits, unemployment benefits, workman's compensation, help from relatives (including child payments and alimony), and so on.**

- <\$14,000
- \$14,000 - <\$25,000
- \$25,000 - <\$50,000
- \$50,000 – <\$75,000
- \$75,000 - <\$100,000
- \$100,000 - <\$150,000
- >=\$150,000
- Choose not to answer
- Don't know/not sure

**How do your household finances usually work out at the end of the month?**

- Some money left over
- Just enough money to make ends meet
- Not enough money to make ends meet
- Choose not to answer



**This next section is about alcohol, tobacco products and other drugs. We will ask you some questions about your experience of using these substances across your lifetime and in the past three months. These substances can be smoked, swallowed, snorted, inhaled, injected, or taken in the form of pills.**

**Some of the substances listed may be prescribed by a doctor (like amphetamines, sedatives, pain medications). We will not record medications that are used as prescribed by your doctor. However, if you have taken such medications for reasons other than prescription, or taken them more frequently or at higher doses than prescribed, please let us know. While we are also interested in knowing about your use of various illicit drugs, please be assured that information on such use will be treated as strictly confidential.**

**1. In your life, which of the following substances have you ever used?  
(NON-MEDICAL USE ONLY)**

| List of Substances                                                     | Yes                      | No                       |
|------------------------------------------------------------------------|--------------------------|--------------------------|
| <b>Tobacco products</b><br>cigarettes, chewing tobacco, cigars, etc.   | <input type="checkbox"/> | <input type="checkbox"/> |
| <b>Alcoholic beverages</b><br>beer, wine, spirits, etc.                | <input type="checkbox"/> | <input type="checkbox"/> |
| <b>Cannabis</b><br>marijuana, pot, grass, hash, etc.                   | <input type="checkbox"/> | <input type="checkbox"/> |
| <b>Cocaine</b><br>coke, crack, etc.                                    | <input type="checkbox"/> | <input type="checkbox"/> |
| <b>Amphetamine type stimulants</b><br>speed, diet pills, ecstasy, etc. | <input type="checkbox"/> | <input type="checkbox"/> |
| <b>Inhalants</b><br>nitrous, glue, petrol, paint thinner, etc.         | <input type="checkbox"/> | <input type="checkbox"/> |
| <b>Sedatives or sleeping pills</b><br>valium, serepax, rohypnol, etc.  | <input type="checkbox"/> | <input type="checkbox"/> |
| <b>Hallucinogens</b><br>LSD, acid, mushrooms, PCP, special K, etc.     | <input type="checkbox"/> | <input type="checkbox"/> |
| <b>Opioids</b><br>heroin, morphine, methadone, codeine, etc.           | <input type="checkbox"/> | <input type="checkbox"/> |
| <b>Other (Please describe):</b>                                        | <input type="checkbox"/> | <input type="checkbox"/> |

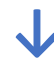

If you answered “No” to all substances, skip to page 24.

2. In the past three months, how often have you used the following substances?

| List of Substances                                                     | Never                    | Once or twice            | Monthly                  | Weekly                   | Daily or almost daily    |
|------------------------------------------------------------------------|--------------------------|--------------------------|--------------------------|--------------------------|--------------------------|
| <b>Tobacco products</b><br>cigarettes, chewing tobacco, cigars, etc.   | <input type="checkbox"/> |
| <b>Alcoholic beverages</b><br>beer, wine, spirits, etc.                | <input type="checkbox"/> |
| <b>Cannabis</b><br>marijuana, pot, grass, hash, etc.                   | <input type="checkbox"/> |
| <b>Cocaine</b><br>coke, crack, etc.                                    | <input type="checkbox"/> |
| <b>Amphetamine type stimulants</b><br>speed, diet pills, ecstasy, etc. | <input type="checkbox"/> |
| <b>Inhalants</b><br>nitrous, glue, petrol, paint thinner, etc.         | <input type="checkbox"/> |
| <b>Sedatives or sleeping pills</b><br>valium, serepax, rohypnol, etc.  | <input type="checkbox"/> |
| <b>Hallucinogens</b><br>LSD, acid, mushrooms, PCP, special K, etc.     | <input type="checkbox"/> |
| <b>Opioids</b><br>heroin, morphine, methadone, codeine, etc.           | <input type="checkbox"/> |
| <b>Other (please describe):</b>                                        | <input type="checkbox"/> |

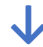

If you answered "Never" to all substances, skip to Question 6

**3. During the past three months, how often have you had a strong desire or urge to use the following substances?**

| List of Substances                                                     | Never                    | Once or twice            | Monthly                  | Weekly                   | Daily or almost daily    |
|------------------------------------------------------------------------|--------------------------|--------------------------|--------------------------|--------------------------|--------------------------|
| <b>Tobacco products</b><br>cigarettes, chewing tobacco, cigars, etc.   | <input type="checkbox"/> |
| <b>Alcoholic beverages</b><br>beer, wine, spirits, etc.                | <input type="checkbox"/> |
| <b>Cannabis</b><br>marijuana, pot, grass, hash, etc.                   | <input type="checkbox"/> |
| <b>Cocaine</b><br>coke, crack, etc.                                    | <input type="checkbox"/> |
| <b>Amphetamine type stimulants</b><br>speed, diet pills, ecstasy, etc. | <input type="checkbox"/> |
| <b>Inhalants</b><br>nitrous, glue, petrol, paint thinner, etc.         | <input type="checkbox"/> |
| <b>Sedatives or sleeping pills</b><br>valium, serepax, rohypnol, etc.  | <input type="checkbox"/> |
| <b>Hallucinogens</b><br>LSD, acid, mushrooms, PCP, special K, etc.     | <input type="checkbox"/> |
| <b>Opioids</b><br>heroin, morphine, methadone, codeine, etc.           | <input type="checkbox"/> |
| <b>Other (please describe):</b>                                        | <input type="checkbox"/> |

**4. During the past three months, how often has your use of the following substances led to health, social, legal, or financial problems?**

| List of Substances                                                     | Never                    | Once or twice            | Monthly                  | Weekly                   | Daily or almost daily    |
|------------------------------------------------------------------------|--------------------------|--------------------------|--------------------------|--------------------------|--------------------------|
| <b>Tobacco products</b><br>cigarettes, chewing tobacco, cigars, etc.   | <input type="checkbox"/> |
| <b>Alcoholic beverages</b><br>beer, wine, spirits, etc.                | <input type="checkbox"/> |
| <b>Cannabis</b><br>marijuana, pot, grass, hash, etc.                   | <input type="checkbox"/> |
| <b>Cocaine</b><br>coke, crack, etc.                                    | <input type="checkbox"/> |
| <b>Amphetamine type stimulants</b><br>speed, diet pills, ecstasy, etc. | <input type="checkbox"/> |
| <b>Inhalants</b><br>nitrous, glue, petrol, paint thinner, etc.         | <input type="checkbox"/> |
| <b>Sedatives or sleeping pills</b><br>valium, serepax, rohypnol, etc.  | <input type="checkbox"/> |
| <b>Hallucinogens</b><br>LSD, acid, mushrooms, PCP, special K, etc.     | <input type="checkbox"/> |
| <b>Opioids</b><br>heroin, morphine, methadone, codeine, etc.           | <input type="checkbox"/> |
| <b>Other (please describe):</b>                                        | <input type="checkbox"/> |

5. During the past three months, how often have you failed to do what was normally expected of you because of your use of the following substances?

| List of Substances                                                     | Never                    | Once or twice            | Monthly                  | Weekly                   | Daily or almost daily    |
|------------------------------------------------------------------------|--------------------------|--------------------------|--------------------------|--------------------------|--------------------------|
| <b>Tobacco products</b><br>cigarettes, chewing tobacco, cigars, etc.   | <input type="checkbox"/> |
| <b>Alcoholic beverages</b><br>beer, wine, spirits, etc.                | <input type="checkbox"/> |
| <b>Cannabis</b><br>marijuana, pot, grass, hash, etc.                   | <input type="checkbox"/> |
| <b>Cocaine</b><br>coke, crack, etc.                                    | <input type="checkbox"/> |
| <b>Amphetamine type stimulants</b><br>speed, diet pills, ecstasy, etc. | <input type="checkbox"/> |
| <b>Inhalants</b><br>nitrous, glue, petrol, paint thinner, etc.         | <input type="checkbox"/> |
| <b>Sedatives or sleeping pills</b><br>valium, serepax, rohypnol, etc.  | <input type="checkbox"/> |
| <b>Hallucinogens</b><br>LSD, acid, mushrooms, PCP, special K, etc.     | <input type="checkbox"/> |
| <b>Opioids</b><br>heroin, morphine, methadone, codeine, etc.           | <input type="checkbox"/> |
| <b>Other (please describe):</b>                                        | <input type="checkbox"/> |

**6. Has a friend or relative or anyone else ever expressed concern about your use of the following substances?**

| <b>List of Substances</b>                                              | <b>No, never</b>         | <b>Yes, in the past 3 months</b> | <b>Yes, but not in the past 3 months</b> |
|------------------------------------------------------------------------|--------------------------|----------------------------------|------------------------------------------|
| <b>Tobacco products</b><br>cigarettes, chewing tobacco, cigars, etc.   | <input type="checkbox"/> | <input type="checkbox"/>         | <input type="checkbox"/>                 |
| <b>Alcoholic beverages</b><br>beer, wine, spirits, etc.                | <input type="checkbox"/> | <input type="checkbox"/>         | <input type="checkbox"/>                 |
| <b>Cannabis</b><br>marijuana, pot, grass, hash, etc.                   | <input type="checkbox"/> | <input type="checkbox"/>         | <input type="checkbox"/>                 |
| <b>Cocaine</b><br>coke, crack, etc.                                    | <input type="checkbox"/> | <input type="checkbox"/>         | <input type="checkbox"/>                 |
| <b>Amphetamine type stimulants</b><br>speed, diet pills, ecstasy, etc. | <input type="checkbox"/> | <input type="checkbox"/>         | <input type="checkbox"/>                 |
| <b>Inhalants</b><br>nitrous, glue, petrol, paint thinner, etc.         | <input type="checkbox"/> | <input type="checkbox"/>         | <input type="checkbox"/>                 |
| <b>Sedatives or sleeping pills</b><br>valium, serepax, rohypnol, etc.  | <input type="checkbox"/> | <input type="checkbox"/>         | <input type="checkbox"/>                 |
| <b>Hallucinogens</b><br>LSD, acid, mushrooms, PCP, special K, etc.     | <input type="checkbox"/> | <input type="checkbox"/>         | <input type="checkbox"/>                 |
| <b>Opioids</b><br>heroin, morphine, methadone, codeine, etc.           | <input type="checkbox"/> | <input type="checkbox"/>         | <input type="checkbox"/>                 |
| <b>Other (please describe):</b>                                        | <input type="checkbox"/> | <input type="checkbox"/>         | <input type="checkbox"/>                 |

**7. Have you ever tried and failed to control, cut down, or stop using the following substances?**

| <b>List of Substances</b>                                              | <b>No, never</b>         | <b>Yes, in the past 3 months</b> | <b>Yes, but not in the past 3 months</b> |
|------------------------------------------------------------------------|--------------------------|----------------------------------|------------------------------------------|
| <b>Tobacco products</b><br>cigarettes, chewing tobacco, cigars, etc.   | <input type="checkbox"/> | <input type="checkbox"/>         | <input type="checkbox"/>                 |
| <b>Alcoholic beverages</b><br>beer, wine, spirits, etc.                | <input type="checkbox"/> | <input type="checkbox"/>         | <input type="checkbox"/>                 |
| <b>Cannabis</b><br>marijuana, pot, grass, hash, etc.                   | <input type="checkbox"/> | <input type="checkbox"/>         | <input type="checkbox"/>                 |
| <b>Cocaine</b><br>coke, crack, etc.                                    | <input type="checkbox"/> | <input type="checkbox"/>         | <input type="checkbox"/>                 |
| <b>Amphetamine type stimulants</b><br>speed, diet pills, ecstasy, etc. | <input type="checkbox"/> | <input type="checkbox"/>         | <input type="checkbox"/>                 |
| <b>Inhalants</b><br>nitrous, glue, petrol, paint thinner, etc.         | <input type="checkbox"/> | <input type="checkbox"/>         | <input type="checkbox"/>                 |
| <b>Sedatives or sleeping pills</b><br>valium, serepax, rohypnol, etc.  | <input type="checkbox"/> | <input type="checkbox"/>         | <input type="checkbox"/>                 |
| <b>Hallucinogens</b><br>LSD, acid, mushrooms, PCP, special K, etc.     | <input type="checkbox"/> | <input type="checkbox"/>         | <input type="checkbox"/>                 |
| <b>Opioids</b><br>heroin, morphine, methadone, codeine, etc.           | <input type="checkbox"/> | <input type="checkbox"/>         | <input type="checkbox"/>                 |
| <b>Other (please describe):</b>                                        | <input type="checkbox"/> | <input type="checkbox"/>         | <input type="checkbox"/>                 |

**If yes to any substance in Question 7, how could the people who work at your dialysis facility help you?**



**Have you ever used any drug by injection? (NON-MEDICAL USE ONLY)**

- No, never
- Yes, in the past 3 months
- Yes, but not in the past 3 month

**Table S1.** Unadjusted Odds of Food Insecurity by Demographic Risk Factors and Residential Segregation

| Sample Characteristics   | Residential Segregation                                      |                                                              |                                       |
|--------------------------|--------------------------------------------------------------|--------------------------------------------------------------|---------------------------------------|
|                          | More Segregated <sup>1</sup><br><i>n</i> = 49<br>OR (95% CI) | Less Segregated <sup>2</sup><br><i>n</i> = 56<br>OR (95% CI) | Interaction term p-value <sup>3</sup> |
| <b>Age Group (years)</b> |                                                              |                                                              |                                       |
| 55 – 86                  | (ref)                                                        | (ref)                                                        | 0.12                                  |
| 27 – 54                  | 3.3 (1.49 – 7.32)                                            | 1.42 (0.71 – 2.85)                                           |                                       |
| <b>Gender</b>            |                                                              |                                                              |                                       |
| Female                   | (ref)                                                        | (ref)                                                        | 0.006                                 |
| Male                     | 3.7 (1.61 – 8.53)                                            | 0.85 (0.45 – 1.6)                                            |                                       |

<sup>1</sup>County-level Dissimilarity Index above median of 61; interpretation: more than 61% of residents would have to relocate within locality for distribution of Black and White residents to become even

<sup>2</sup>County-level Dissimilarity Index below median of 61

<sup>3</sup>Bivariate mixed effects logistic regression model with interaction term
